# Supplementary material
Source: publisher figshare collection journal article supplement (https://acs.figshare.com/ndownloader/files/14486102)
Supplement: Supplementary file 1 [file 14486102]

## Supporting Information

# **Lysozyme responsive spray-dried chitosan particles for early detection of wound infection**

*Claudia Tallian<sup>†</sup>, Gregor Tegl<sup>†\*</sup>, Lisa Quadlbauer<sup>†</sup>, Robert Vielnascher<sup>†,‡</sup>, Simone Weinberger<sup>‡</sup>, Raymon Cremers<sup>§</sup>, Alessandro Pellis<sup>||</sup>, Johannes W.O. Salari<sup>§</sup> and Georg M. Guebitz<sup>†,‡</sup>*

<sup>†</sup>University of Natural Resources and Life Sciences, Vienna (BOKU), Institute for Environmental Biotechnology, Department for Agrobiotechnology (IFA-Tulln), Konrad-Lorenz-Strasse 20, 3430 Tulln an der Donau, Austria.

<sup>‡</sup>Austrian Centre of Industrial Biotechnology, Konrad-Lorenz-Strasse 20, 3430 Tulln an der Donau, Austria.

<sup>§</sup> Netherlands Institute for Applied Scientific Research, Eindhoven, 5612 AP, The Netherlands

<sup>||</sup> Department of Chemistry, University of York, Heslington, York, YO10 5DD, United Kingdom

\* Corresponding Author: [gregor.tegl@gmail.com](mailto:gregor.tegl@gmail.com)

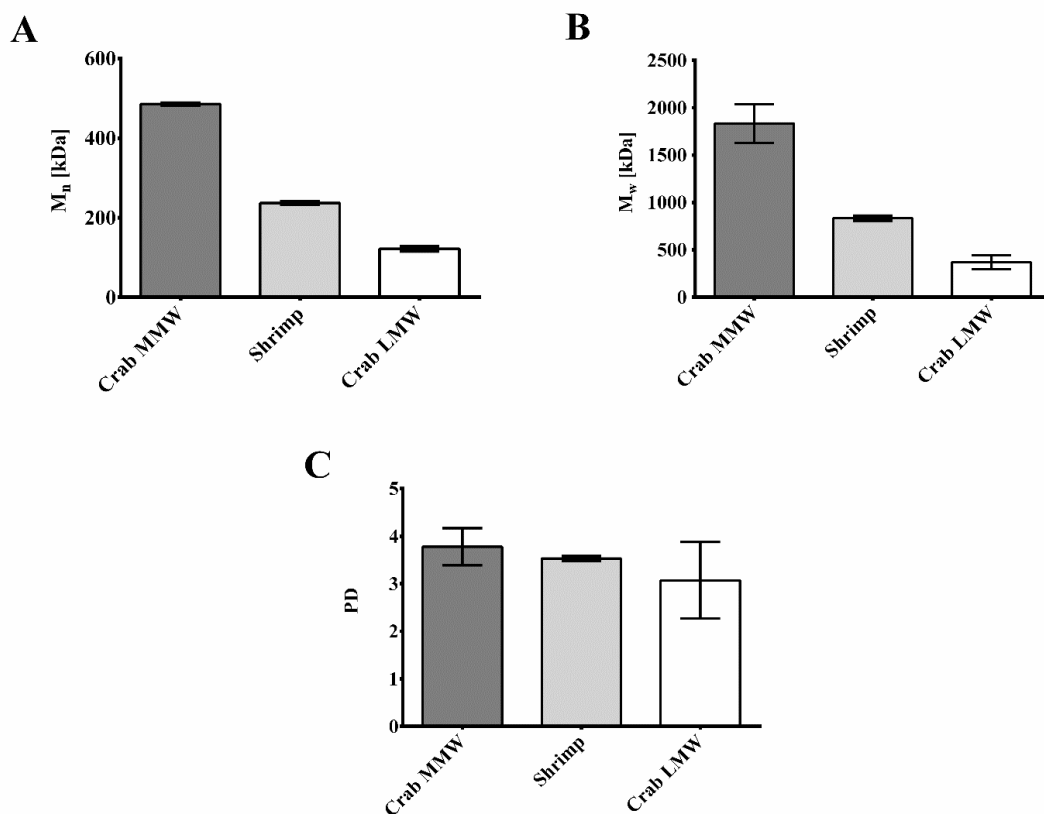

**Figure S1.** Results of SEC-MALLS analysis of native chitosans of various properties (crab MMW and LMW, shrimps). (A) Number average molecular weight in kDa. (B) Weight average molecular weight in kDa. (C) Polydispersity

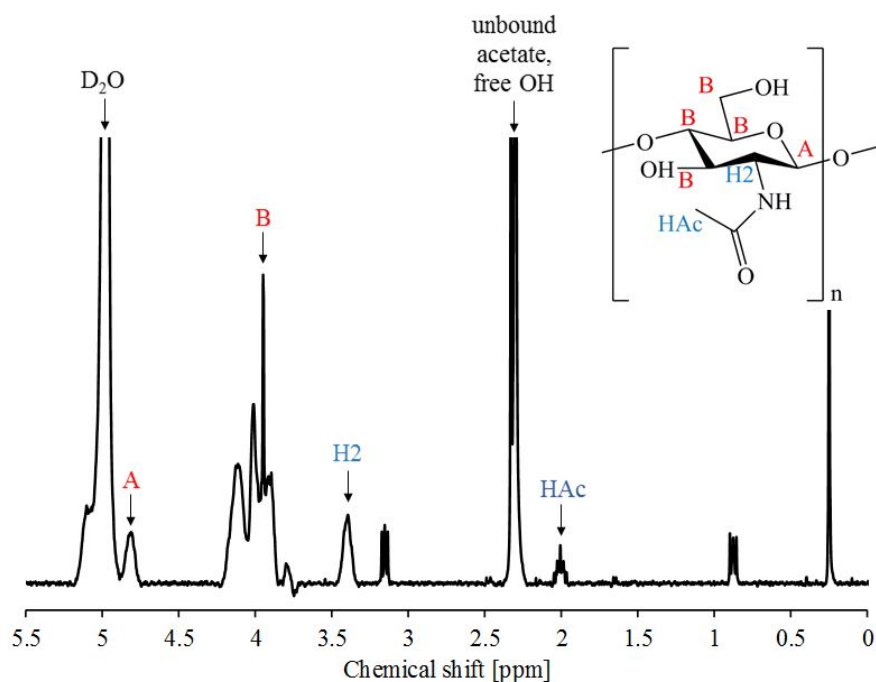

**Figure S2.** Results of  $^1\text{H}$  NMR analysis of N-acetylated crab LMW chitosans sample J for the calculation of the degree of acetylation based on H<sub>2</sub> and HAc peaks
